# Supplementary material for: The stem-like Stat3-responsive cells of zebrafish intestine are Wnt/β-catenin dependent
Source: PubMed Central journal article supplement (PMC7328161; doi:10.1242/dev.188987), 2020-06-19
Supplement: develop-147-188987-s1.pdf [file develop-147-188987-s1.pdf]

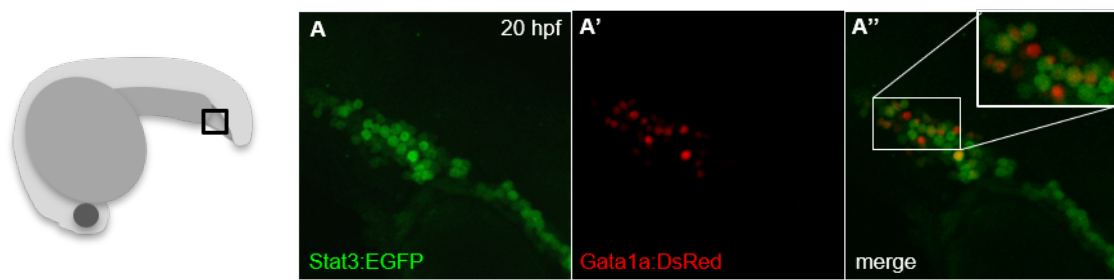

**Fig. S1: Stat3 reporter is expressed in erythroid progenitor cells.** A-A'': Confocal lateral view of haematopoietic tissue of double transgenic embryos obtained crossing the *Tg(7xStat3:EGFP)* (A) with *Tg(gata1a:DsRed)* (A'').

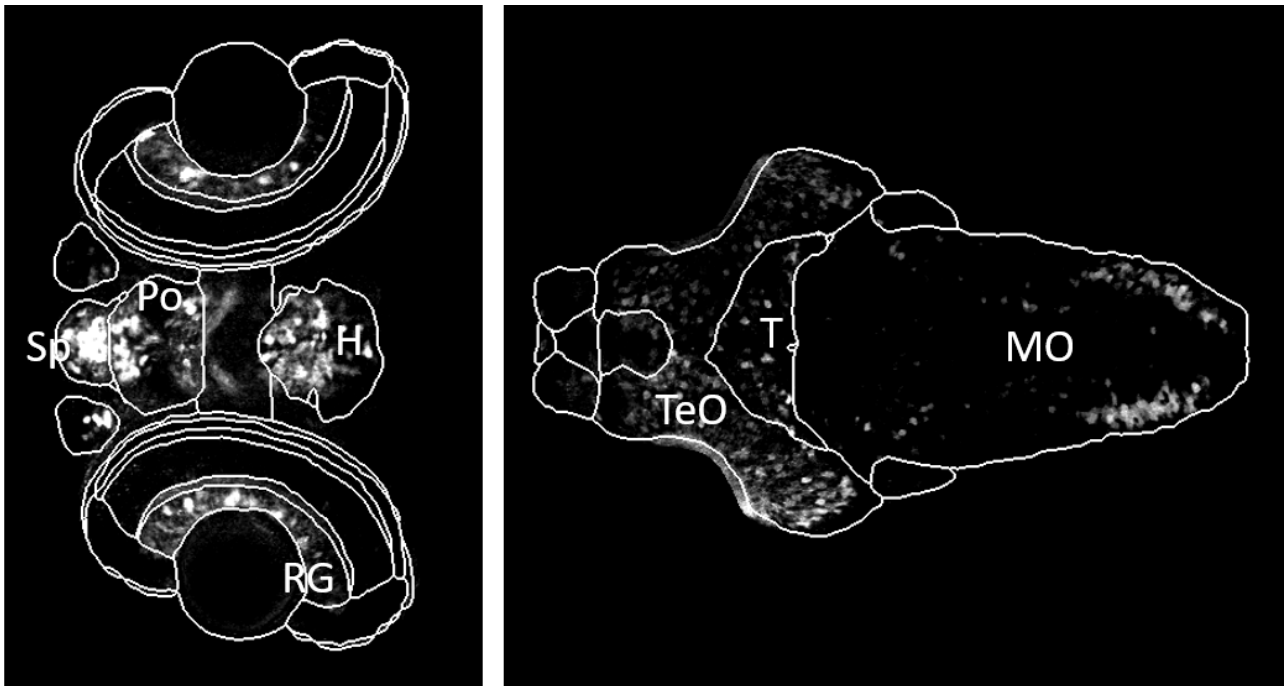

- 77 Tectum opticum (TeO)
- 97 Medulla oblongata (MO)
- 81 tegmentum (T)
- 7 subpallium (Sp)
- 45 preoptic region (Po)
- 48 hypothalamus (H)
- 59 retinal layer (RG)

**Fig. S2: *Tg(7xStat3:EGFP)* reporter expression in the brain of 72-hpf larvae.** A-B: Single planes of *Tg(7xStat3:EGFP)* brain at 72 hpf. Images have been obtained with VIBEZ-Z software. H= hypothalamus, Sp= subpallium, Po= preoptic region, RG= retinal layer, TeO= tectum opticum, MO=medulla oblongata, T= tegumentum.

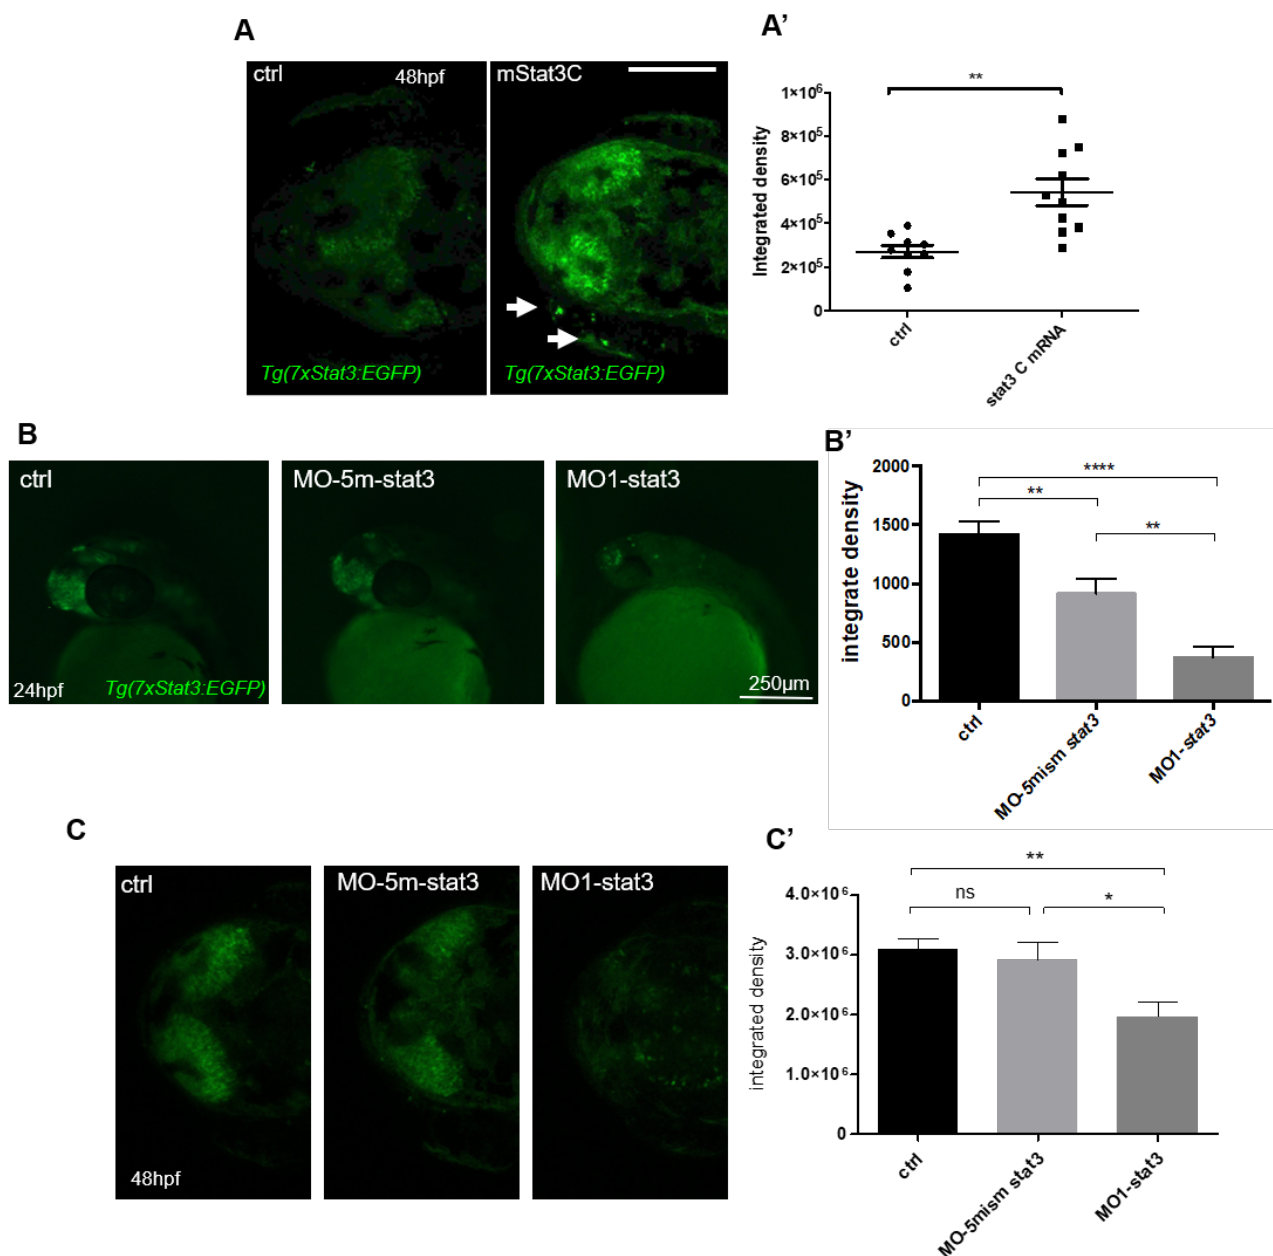

**Fig. S3: *Tg(7xStat3:EGFP)* reporter line respond to silencing and overexpression of *stat3*.** A: Dorsal view live image of the head of *Tg(7xStat3:EGFP)* controls (left) or *mStat3C* mRNA injected embryos (right) at 48hpf. Arrowheads highlight ectopic fluorescent signal. Scale bar: 100µm. A': EGFP fluorescence quantification in the TeO of *mStat3C* injected and control larvae at 48 hpf. Statistical analysis was performed by unpaired t-test (n=20); \*\*p<0.01 B: representative pictures of 24-hpf *Tg(7xStat3:EGFP)* injected with *stat3*-MO1 (Liu *et al.*, 2017; Miyagi *et al.*, 2004; Yamashita *et al.*, 2002) 5-mismatch morpholino B': Quantification of EGFP fluorescence in 24-hpf embryos injected with *stat3*-MO1 morpholino and 5-mismatch morpholino on the reporter line. Scale bar=250µm, statistical analysis was performed by unpaired t-test on 3 biological replicates. \*\*p<0.01, \*\*\*\*p<0.0001; error bars=SEM. C: dorsal view of 48-hpf *Tg(7xStat3:EGFP)* injected with *stat3*-MO1

and 5-mismatch morpholino. C': Quantification of EGFP fluorescence in 48-hpf *Tg(7xStat3:EGFP)* embryos injected with stat3-MO1 morpholino and 5-mismatch morpholino. \* $p < 0.05$ , \*\* $p < 0.01$ ; error bars=SEM

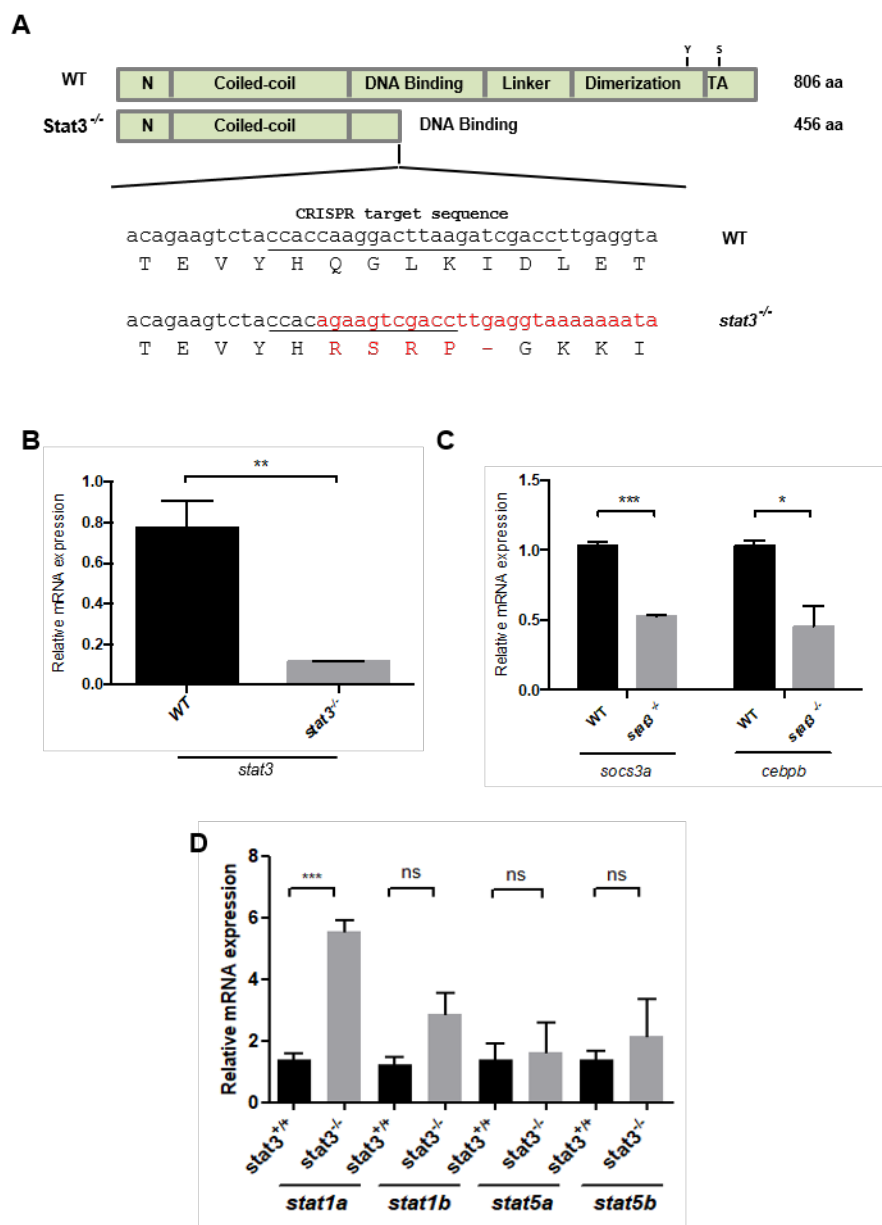

**Fig. S4: *stat3<sup>ia23</sup>* mutant validation.** A: Schematic representation of *stat3<sup>-/-</sup>* mutant allele in comparison with WT. B: qRT-PCR analysis of *stat3* mRNA expression normalized on *gapdh* from WT and *stat3<sup>-/-</sup>* siblings at 6 dpf (p-value= 0,0073). C: qRT-PCR analysis of *socs3a* and *cebpb* Stat3 targets expression normalized on *gapdh* from WT and *stat3<sup>-/-</sup>* siblings at 6 dpf, *zgapdh* was used as internal control (p-values= 0,001; 0,0205); Statistical analysis was performed by unpaired t-test on 3 independent biological samples. \*\*p<0,01; error bars=SEM. D: qRT-PCR analysis of *stat1a*, *stat1b*, *stat5a* and *stat5b* mRNA expression levels normalized on *gapdh* from *stat3<sup>+/+</sup>* and *stat3<sup>-/-</sup>* siblings at 6 dpf (\*\*p<0.001)

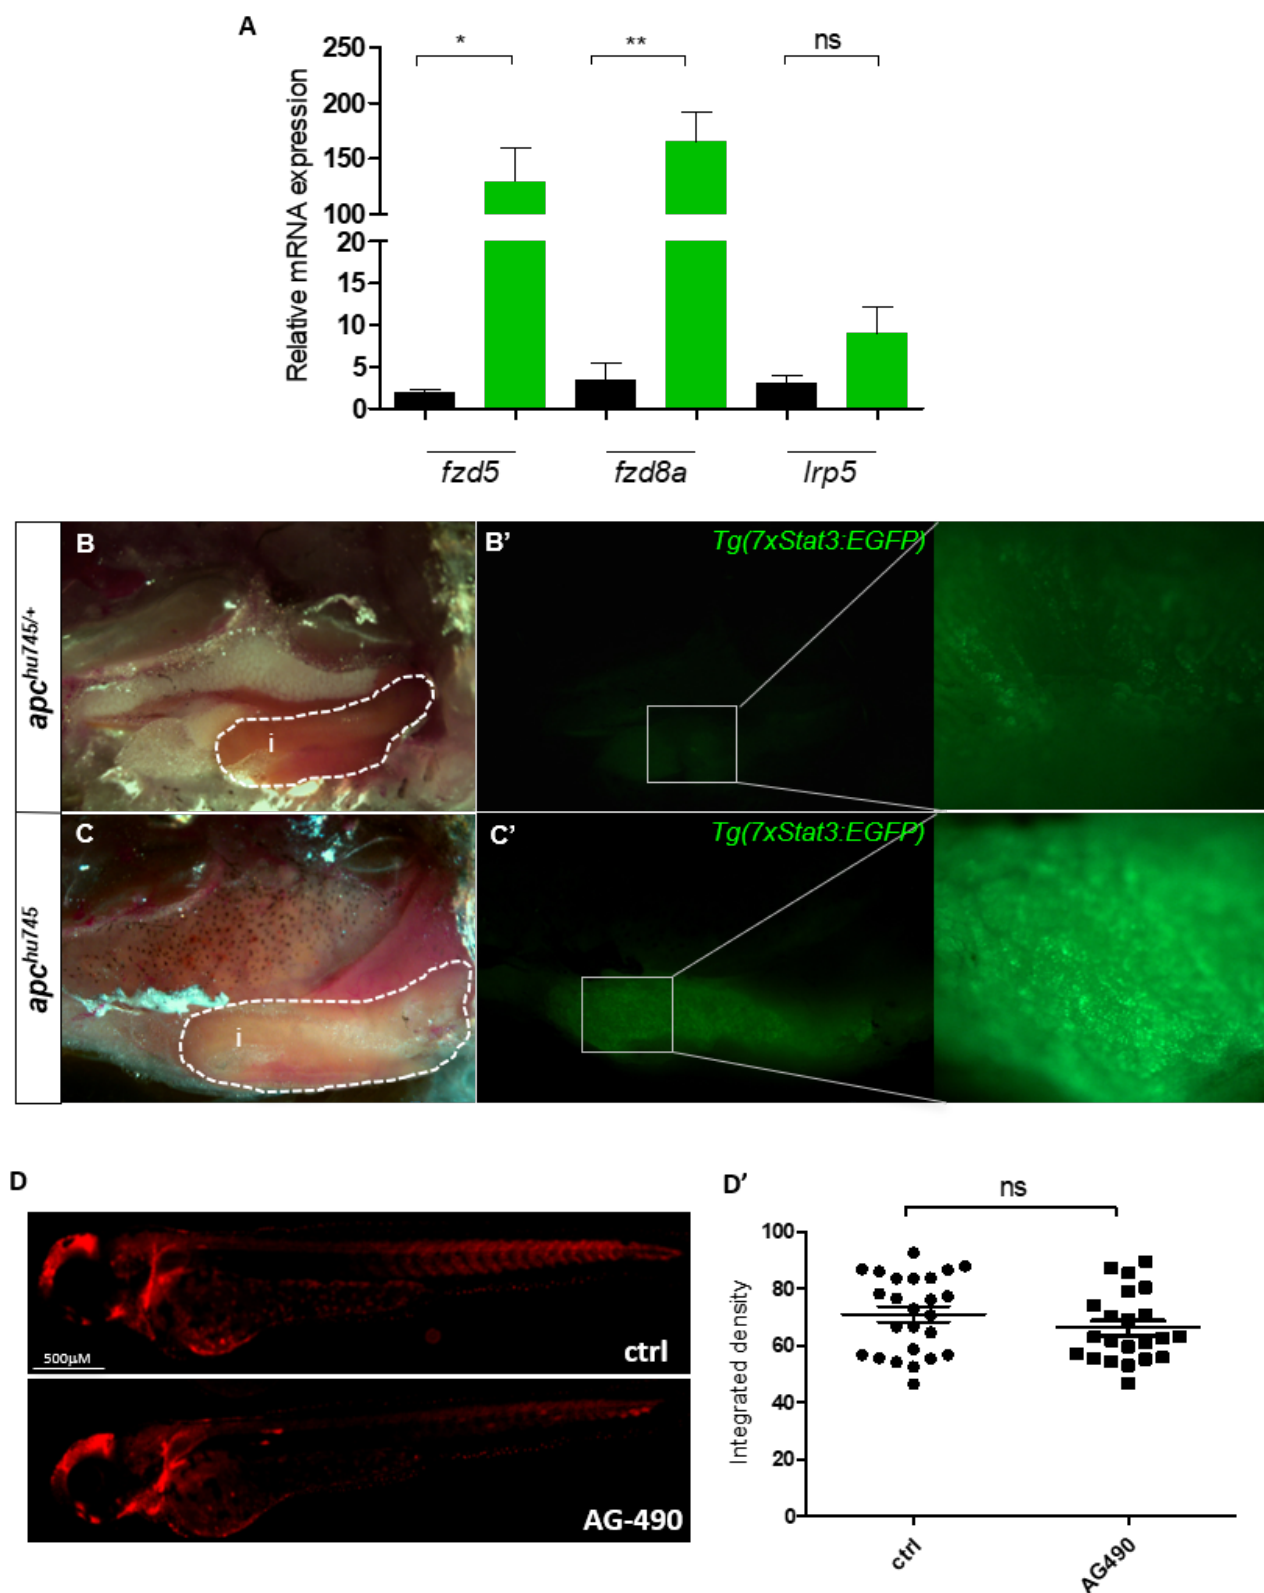

**Fig. S5: Stat3 pathway is strongly activated in zebrafish *apc*-driven tumor.** A: qRT-PCR analysis of *fzd5*, *fzd8a* and *lrp5* on EGFP-positive and EGFP-negative cells sorted from adult intestines. B-C'': *In vivo* EGFP expression is ectopic in 12 mpf *Tg(7xStat3:EGFP)/apc<sup>hu745</sup>* hyperplastic intestine (B-B') with respect to *Tg(7xStat3:EGFP)/apc<sup>hu745/+</sup>* siblings (B-B'). C-C': representative pictures of 3-dpf

*Tg(7xTCF-Xla.Siam:nlsmCherry)<sup>ia5</sup>* reporter larvae treated with DMSO and 80  $\mu$ M AG-490 from 8-72 hpf (D); quantification of *Tg(7xTCF-Xla.Siam:nlsmCherry)<sup>ia5</sup>* reporter larvae fluorescence (D'). Statistical analysis was performed by unpaired t-test. ns=not significant.

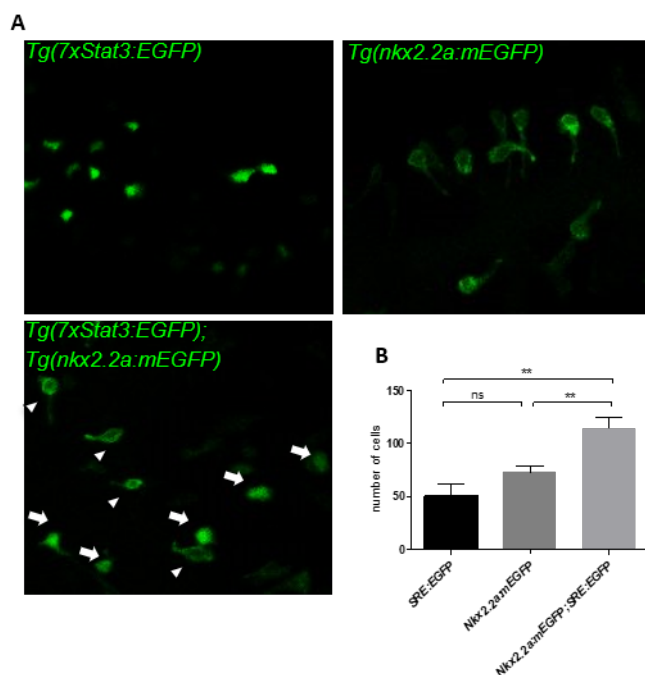

**Fig. S6: EGFP positive cells of *Tg(7xStat3:EGFP)* zebrafish line are not secretory cells.** A: representative pictures of *Tg(7xStat3:EGFP)*, *Tg(nkx2.2a:mEGFP)* and *Tg(7xStat3:EGFP)/Tg(nkx2.2a:mEGFP)* 6-dpf larvae intestine. B: number of EGFP-positive cells measured in intestines of *Tg(7xStat3:EGFP)*, *Tg(nkx2.2a:mEGFP)* and *Tg(7xStat3:EGFP)/Tg(nkx2.2a:mEGFP)* 6-dpf. Arrows indicate *Tg(nkx2.2a:mEGFP)* positive cells; arrowheads indicate *Tg(7xStat3:EGFP)* positive cells. \*\* $p < 0.01$ , ns=not significant; error bars=SEM.

| <b>Gene</b>      | <b>Forward primer sequence</b> | <b>Reverse primer sequence</b> |
|------------------|--------------------------------|--------------------------------|
| <i>zstat3</i>    | TGCCACCAACATCCTAGTGT           | GCTTGTTTGCACCTTTTGACTGA        |
| <i>zgapdh</i>    | GTGGAGTCTACTGGTGTCTTC          | GTGCAGGAGGCATTGCTTACA          |
| <i>zcebpb</i>    | CCAAAAGTAACGGGCGACAC           | ATCTTCCCTTACCTGACGGC           |
| <i>zsocs3</i>    | GGAAGACAAGAGCCGAGACT           | GCGATACACACCAAACCCTG           |
| <i>egfp</i>      | ACGTAAACGGCCACAAGTTC           | AAGTCGTGCTGCTTCATGTG           |
| <i>zstat1a</i>   | GCAGCTCAAGAACTCCTGG            | AAAGGTCTCTGCAGTTGGGT           |
| <i>zstat1b</i>   | CGAGTGGAAGAAGAGACAGC           | GCTGGCCCCTTCTAGATTT            |
| <i>zstat5a</i>   | TGACCCGAGAAGCTAACACC           | GTATGTCCAGTCCTCCCT             |
| <i>zstat5b</i>   | TGAGGAAACAGCAAACCGTG           | GCTGCTGAGTCAAGTGTTCA           |
| <i>zil6</i>      | CGTAAAGAGTCTCCTTGGCG           | GGTTTGAGGAGAGGAGTGCT           |
| <i>zgp130</i>    | TGCTGGAGTGGGTGAATGAA           | GGCTTGGTTACTGGTGTTC            |
| <i>zjak2a</i>    | CTTCGAGAGTCAGGAGCCC            | CTGAAGCTTCTTCACCGCC            |
| <i>zjak2b</i>    | ACGTATTGTGATTCGCGGA            | ACAAAAGACAAGGCCTGCAT           |
| <i>zsox9b</i>    | CTCGGCAAACCTCTGGAGACT          | GCGCATTGGTGGAGATCTG            |
| <i>zagr2</i>     | GCACAGACATACGAGGAAGC           | GGAGACAAGTGCTTATCTGTG          |
| <i>zpept1</i>    | GATTGCTTTGGGAACAGGAGG          | GATGGGTGTGATGAGAGTGG           |
| <i>zfabp2</i>    | GCTGCCCATGACAACCTG             | CGTGTCTCCCTCTATGACC            |
| <i>znotch2</i>   | GACGAATGCATCTCCAGTGC           | GCAGCAGCCACAGCAACC             |
| <i>zpcna</i>     | CCTTGCCACTGGTCTTTGAA           | GGCACACGAGATCATGACAG           |
| <i>zcyclinD1</i> | CCAACTTCTCTCGCAAGTC            | TGGTCTCTGTGGAGATGTGC           |
| <i>zfzd5</i>     | CCTAACTGTGCACTGCCTTG           | ATTTGAAGCGCTCCATGTGC           |
| <i>zfzd8a</i>    | TGCAATCGGGAGTATGACGT           | CTCGTTTCCCCACTTCATGC           |
| <i>zlrp5</i>     | TTCTCGGAGGGCCTGATTTT           | TTGTCTCCGAGTCAGTCCAG           |

**Tab. 1:** list of primer used for Real Time qPCR.
